# Supplementary material for: Pangenome-based design of strain-specific primers enables precise monitoring of bacteria in human microbiome intervention trials
Source: Research Square preprint supplement (doi:10.21203/rs.3.rs-8210879/v1), 2025-12-19
Supplement: Supplementary file 1 [file 8f153493d919c76449f0e074.docx]

## Supplementary information

|  | Strain | Slope | R² | efficiency |
| --- | --- | --- | --- | --- |
|  | *L. rhamnosus*  GG | cT = 42.9 – 3.27 * Log(Concentration) | 74% | 102% |
|  | *L. plantarum*  WCFS1 | cT = 45.95 - 3.39* Log(Concentration) | 98% | 97% |
|  | *L. reuteri*  AMBV038 | cT = 34.98 - 3.24* Log(Concentration) | 99% | 104% |
|  | *L. reuteri*  AMBF471 | cT = 46.84 - 3.2* Log(Concentration) | 100% | 105% |
|  | *S. salivarius*  AMBR024 | cT = 43.36 - 3.28* Log(Concentration) | 100% | 102% |
|  | *S. salivarius*  AMBR158 | cT = 42.88 - 3.4* Log(Concentration) | 100% | 97% |


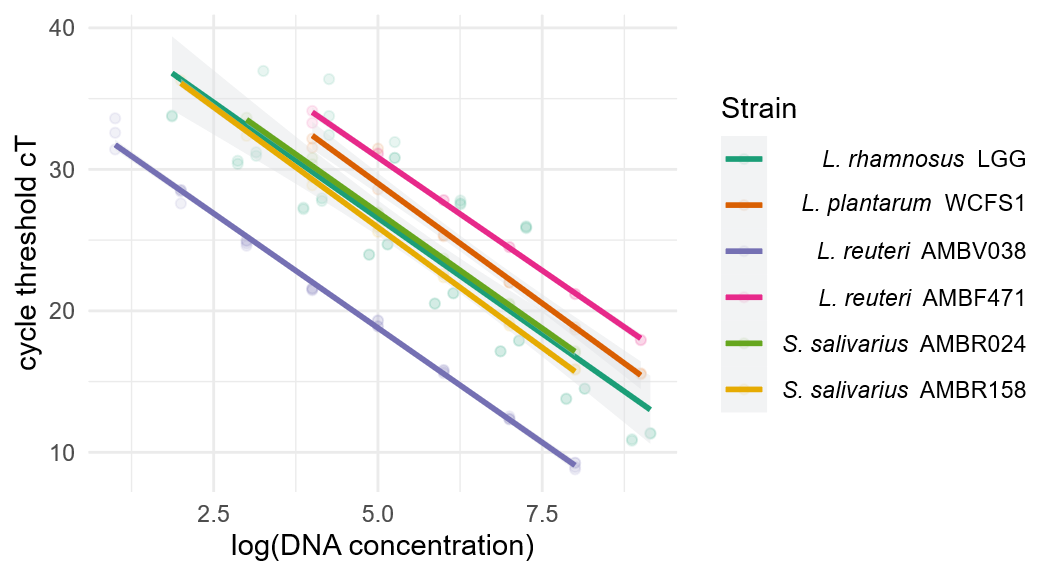


**Figure S1: Standard curves for all designed qPCR primers with their according slope and efficiencies.**

**Table S1: Overview of the sequenced publicly available genomes that are too similar with their accession number and the average nucleotide identity (ANI) with the reference strain.**

| accession number | Ani | species | Removed |
| --- | --- | --- | --- |
| GCF_000026505.1 | 100 | *L. rhamnosus* | Reference |
| GCF_902381635.1 | 100 | *L. rhamnosus* | TRUE |
| GCF_003353455.1 | 99.9989 | *L. rhamnosus* | TRUE |
| GCF_017795605.1 | 99.9908 | *L. rhamnosus* | TRUE |
| GCF_015238575.1 | 99.9903 | *L. rhamnosus* | TRUE |
| GCF_000203855.3 | 100 | *L. plantarum* | Reference |
| GCF_017798305.1 | 99.9984 | *L. plantarum* | TRUE |
